# Supplementary material for: A novel variant of the Calvin–Benson cycle bypassing fructose bisphosphate
Source: PubMed Central journal article supplement (PMC8927339; doi:10.1038/s41598-022-07836-7), 2022-03-16
Supplement: 41598_2022_7836_MOESM1_ESM.pdf [file 41598_2022_7836_MOESM1_ESM.pdf]

## Procedures to compute elementary flux modes or extreme pathways forming glyceraldehyde 3-phosphate (GAP) from CO<sub>2</sub>

Please prepare the 3 text files named Paths\_example.txt, perform\_expa.bat, and CO2\_to\_GAP.expa as described below. The following procedure was successful on a Windows PC on August 18, 2021.

1. Go to <https://systemsbiology.ucsd.edu/Downloads/ExtremePathwayAnalysis>
2. Get expa.zip by clicking “A new ExPA program (02/16/05)”.
3. Extract expa.exe from expa.zip.
4. Make a working directory and put the 3 files of expa.exe, perform\_expa.bat, and CO2\_to\_GAP.expa there.
5. Double-click on perform\_expa.bat in the directory from Windows Explorer.
6. Find Paths.txt generated in the same directory. The content of Paths.txt must be the same as that of Paths\_example.txt. Paths.txt as well as Paths\_example.txt carries a matrix, where each of rows corresponds to one elementary flux mode or extreme pathway and each of columns to one of the fluxes defined in CO2\_to\_GAP.expa. The last 3 rows of the matrix correspond to the 3 columns in Table 2, which correspond to the S7P-removing transaldolase variant, the S7P-forming transaldolase variant, and the canonical Calvin-Benson cycle. The other rows correspond to pathways neither consuming CO<sub>2</sub> nor producing GAP. They include 2 cycles composed of 5 reactions, but those cycles require the unrealistic reverse reaction of FBPase or SBPase. Each row of CO2\_to\_GAP.expa beginning at ‘>’ corresponds to the reaction with the same name as defined in Table 1, whilst each row of CO2\_to\_GAP.expa beginning at ‘<’ corresponds to the reverse reaction of the reaction with the same name as defined in Table 1.

### Paths\_example.txt

```
0 0 0 0 0 0 0 1 1 0 0 0 0 0 0 0 1 1 0 0 0 0 0 0 0 0 1 0 0
0 0 0 0 1 1 0 0 0 0 0 0 0 0 0 0 0 0 0 0 1 1 0 0 0 0 0 0 0
0 0 0 0 0 0 0 0 0 0 0 0 0 0 1 0 0 0 0 0 0 0 0 0 0 0 0 1 0
0 0 0 0 0 0 1 0 0 0 0 0 0 0 0 0 0 0 0 0 1 0 0 0 0 0 0 0 0
0 0 0 0 0 0 0 0 0 0 0 1 0 0 0 0 0 0 0 0 0 0 0 0 0 1 0 0 0
0 0 0 0 0 0 0 0 0 0 0 1 0 0 0 0 0 0 0 0 0 0 0 1 0 0 0 0 0
0 0 0 0 1 0 0 0 0 0 0 0 0 0 0 0 0 0 0 1 0 0 0 0 0 0 0 0 0
0 1 0 0 0 0 0 0 0 0 0 0 0 0 0 0 0 0 0 1 0 0 0 0 0 0 0 0 0
1 0 0 0 0 0 0 0 0 0 0 0 0 0 0 0 0 1 0 0 0 0 0 0 0 0 0 0 0
0 0 0 0 0 0 0 0 0 0 0 0 0 0 1 0 0 0 0 0 0 0 0 0 0 0 1 0 0
0 0 1 0 0 0 0 0 0 0 0 0 0 0 0 0 0 1 0 0 0 0 0 0 0 0 0 0 0
0 0 0 0 0 0 0 0 0 1 0 0 0 0 0 0 0 0 0 0 0 0 0 0 1 0 0 0 0
0 0 0 0 0 0 0 0 0 0 0 0 0 0 1 0 0 0 0 0 0 0 0 0 0 0 0 0 0
0 0 0 0 0 0 0 1 0 0 0 0 0 0 0 0 0 0 0 0 1 0 0 0 0 0 0 0 0
0 0 0 0 0 0 0 0 0 0 0 0 0 0 0 0 0 0 0 0 0 0 0 0 1 0 0 0 0
0 0 0 1 0 0 0 0 0 0 0 0 0 0 0 0 0 1 0 0 0 0 0 0 0 0 0 0 0
3 6 6 2 0 0 1 2 2 1 1 2 3 0 0 0 0 0 0 0 0 0 0 0 0 0 0 1 -3 1
3 6 6 2 2 2 1 0 0 1 1 2 3 1 0 0 0 0 0 0 0 0 0 0 0 0 0 0 -3 1
3 6 6 2 1 1 1 1 1 1 1 2 3 0 0 0 0 0 0 0 0 0 0 0 0 0 0 0 -3 1
```

## perform\_expa.bat

```
expa -v CO2_to_GAP.expa
```

## CO2\_to\_GAP.expa

(Internal Fluxes)

|                             |   |    |      |    |      |    |      |    |      |
|-----------------------------|---|----|------|----|------|----|------|----|------|
| >Rubisco                    | I | -1 | CO2  | -1 | RuBP | 2  | PGA  |    |      |
| >PGA_kinase                 | I | -1 | PGA  |    |      | 1  | BPG  |    |      |
| >GAP_dehydrogenase          | I | -1 | BPG  |    |      | 1  | GAP  |    |      |
| >Triose_phosphate_isomerase | I | -1 | GAP  |    |      | 1  | DHAP |    |      |
| >FBP_aldolase               | I | -1 | GAP  | -1 | DHAP | 1  | FBP  |    |      |
| >FBPase                     | I | -1 | FBP  |    |      | 1  | F6P  |    |      |
| >Transketolase              | I | -1 | F6P  | -1 | GAP  | 1  | E4P  | 1  | Xu5P |
| >SBP_aldolase               | I | -1 | E4P  | -1 | DHAP | 1  | SBP  |    |      |
| >SBPase                     | I | -1 | SBP  |    |      | 1  | S7P  |    |      |
| >Transketolase              | I | -1 | S7P  | -1 | GAP  | 1  | R5P  | 1  | Xu5P |
| >Isomerase                  | I | -1 | R5P  |    |      | 1  | Ru5P |    |      |
| >Epimerase                  | I | -1 | Xu5P |    |      | 1  | Ru5P |    |      |
| >Phosphoribulokinase        | I | -1 | Ru5P |    |      | 1  | RuBP |    |      |
| S7P-forming_transaldolase   | I | -1 | E4P  | -1 | F6P  | 1  | S7P  | 1  | GAP  |
| <Rubisco                    | I | 1  | CO2  | 1  | RuBP | -2 | PGA  |    |      |
| <PGA_kinase                 | I | 1  | PGA  |    |      | -1 | BPG  |    |      |
| <GAP_dehydrogenase          | I | 1  | BPG  |    |      | -1 | GAP  |    |      |
| <Triose_phosphate_isomerase | I | 1  | GAP  |    |      | -1 | DHAP |    |      |
| <FBP_aldolase               | I | 1  | GAP  | 1  | DHAP | -1 | FBP  |    |      |
| <FBPase                     | I | 1  | FBP  |    |      | -1 | F6P  |    |      |
| <Transketolase              | I | 1  | F6P  | 1  | GAP  | -1 | E4P  | -1 | Xu5P |
| <SBP_aldolase               | I | 1  | E4P  | 1  | DHAP | -1 | SBP  |    |      |
| <SBPase                     | I | 1  | SBP  |    |      | -1 | S7P  |    |      |
| <Transketolase              | I | 1  | S7P  | 1  | GAP  | -1 | R5P  | -1 | Xu5P |
| <Isomerase                  | I | 1  | R5P  |    |      | -1 | Ru5P |    |      |
| <Epimerase                  | I | 1  | Xu5P |    |      | -1 | Ru5P |    |      |
| <Phosphoribulokinase        | I | 1  | Ru5P |    |      | -1 | RuBP |    |      |
| S7P-removing_transaldolase  | I | 1  | E4P  | 1  | F6P  | -1 | S7P  | -1 | GAP  |

(Exchange Fluxes)

|     |        |
|-----|--------|
| CO2 | Input  |
| GAP | Output |
